# Supplementary material
Source: ML conference proceedings conference paper supplement (https://proceedings.mlr.press/v51/bartels16.html)
Supplement: Supplementary file 1 [file bartels16-supp.pdf]

---

## Probabilistic Approximate Least-Squares (APPENDIX)

---

Simon Bartels

Max Planck Institute for Intelligent Systems  
Tübingen Germany

Philipp Hennig

### An Upper Bound on the Approximation Error

Let  $\mathbf{a}, \mathbf{b} \in \mathbb{R}^N$  be arbitrary vectors. The Gaussian measure (11) on  $\mathbf{H}$  implies that the scalar  $\hat{\mu} := \mathbf{a}^\top \mathbf{H} \mathbf{b}$  is Gaussian distributed as well, with mean  $\mathbf{a}^\top \mathbf{H}_M \mathbf{b}$  and a variance we denote with  $\hat{\epsilon}^2$  (derived in the proof below).

**Theorem 1.** *The absolute error  $|\hat{\mu} - \mathbf{a}^\top \mathbf{H} \mathbf{b}|$  divided by the standard deviation  $\hat{\epsilon}$  is always less than 1:*

$$\frac{|\mathbf{a}^\top \mathbf{H}_M \mathbf{b} - \mathbf{a}^\top \mathbf{H} \mathbf{b}|}{\hat{\epsilon}} < 1 \quad (32)$$

*Proof.* If  $\mathbf{v} \in \mathbb{R}^N$  is a Gaussian random vector  $\mathcal{N}(\mathbf{v}; \boldsymbol{\mu}, \boldsymbol{\Sigma})$  and  $\mathbf{A} \in \mathbb{R}^{M \times N}$  is of rank  $M$  then  $\mathbf{A} \mathbf{v}$  is also Gaussian with  $\mathcal{N}(\mathbf{A} \mathbf{v}; \mathbf{A} \boldsymbol{\mu}, \mathbf{A}^\top \boldsymbol{\Sigma} \mathbf{A})$ . We can rewrite  $\mathbf{a}^\top \mathbf{H}_M \mathbf{b}$  as  $\overrightarrow{\mathbf{a}^\top \mathbf{H}_M \mathbf{b}} = (\mathbf{a}^\top \otimes \mathbf{b}^\top) \overrightarrow{\mathbf{H}_M}$  and it follows that  $\hat{\epsilon}$  has the form

$$\hat{\epsilon}^2 = (\mathbf{a}^\top \otimes \mathbf{b}^\top) (\mathbf{W}_M \otimes \mathbf{W}_M) (\mathbf{a} \otimes \mathbf{b}) \quad (33)$$

To simplify this expression we use that  $\mathbf{a} \otimes \mathbf{b}$  is an  $N^2$  dimensional vector and thus  $\mathbf{a} \otimes \mathbf{b} = (\mathbf{a} \otimes \mathbf{b}) \overrightarrow{\mathbf{1}} = \overrightarrow{\mathbf{a} \mathbf{1} \mathbf{b}^\top} = \overrightarrow{\mathbf{a} \mathbf{b}^\top}$ . Therefore  $\hat{\epsilon}^2$  reduces to

$$\hat{\epsilon}^2 = (\mathbf{a}^\top \otimes \mathbf{b}^\top) \Gamma(\mathbf{W}_M \otimes \mathbf{W}_M) \Gamma \overrightarrow{\mathbf{a} \mathbf{b}^\top} \quad (34)$$

$$= \frac{1}{2} (\mathbf{a}^\top \otimes \mathbf{b}^\top) \Gamma(\mathbf{W}_M \otimes \mathbf{W}_M) \overrightarrow{\mathbf{a} \mathbf{b}^\top + \mathbf{b} \mathbf{a}^\top} \quad (35)$$

$$= \frac{1}{2} (\mathbf{a}^\top \otimes \mathbf{b}^\top) \Gamma \overrightarrow{\mathbf{W}_M \mathbf{a} \mathbf{b}^\top \mathbf{W}_M + \mathbf{W}_M \mathbf{b} \mathbf{a}^\top \mathbf{W}_M} \quad (36)$$

$$= \frac{1}{2} (\mathbf{a}^\top \otimes \mathbf{b}^\top) \overrightarrow{\mathbf{W}_M \mathbf{a} \mathbf{b}^\top \mathbf{W}_M + \mathbf{W}_M \mathbf{b} \mathbf{a}^\top \mathbf{W}_M} \quad (37)$$

$$= \frac{1}{2} \overrightarrow{\mathbf{a}^\top \mathbf{W}_M \mathbf{a} \mathbf{b}^\top \mathbf{W}_M \mathbf{b} + \mathbf{a}^\top \mathbf{W}_M \mathbf{b} \mathbf{a}^\top \mathbf{W}_M \mathbf{b}} \quad (38)$$

$$= \frac{1}{2} (\mathbf{a}^\top \mathbf{W}_M \mathbf{a} \mathbf{b}^\top \mathbf{W}_M \mathbf{b} + (\mathbf{a}^\top \mathbf{W}_M \mathbf{b})^2) \quad (39)$$

If we now choose  $\mathbf{W} = \sqrt{2} \mathbf{H}$ , and therefore  $\mathbf{W}_M =$

$\sqrt{2}(\mathbf{H} - \mathbf{H}_M)$ , then

$$\frac{|\mathbf{a}^\top (\mathbf{H} - \mathbf{H}_M) \mathbf{b}|}{\sqrt{\hat{\epsilon}^2}} \quad (40)$$

$$= \frac{|\mathbf{a}^\top \mathbf{W}_M \mathbf{b}|}{\sqrt{2} \sqrt{\frac{1}{2} \mathbf{a}^\top \mathbf{W}_M \mathbf{a} \cdot \mathbf{b}^\top \mathbf{W}_M \mathbf{b} + \frac{1}{2} (\mathbf{a}^\top \mathbf{W}_M \mathbf{b})^2}} \quad (41)$$

$$= \frac{|\mathbf{a}^\top \mathbf{W}_M \mathbf{b}|}{\sqrt{\mathbf{a}^\top \mathbf{W}_M \mathbf{a} \cdot \mathbf{b}^\top \mathbf{W}_M \mathbf{b} + (\mathbf{a}^\top \mathbf{W}_M \mathbf{b})^2}} \quad (42)$$

$$< \frac{|\mathbf{a}^\top \mathbf{W}_M \mathbf{b}|}{\sqrt{(\mathbf{a}^\top \mathbf{W}_M \mathbf{b})^2}} = 1 \quad (\text{as } \mathbf{W}_M \text{ is s.p.d.}) \quad (43)$$

□

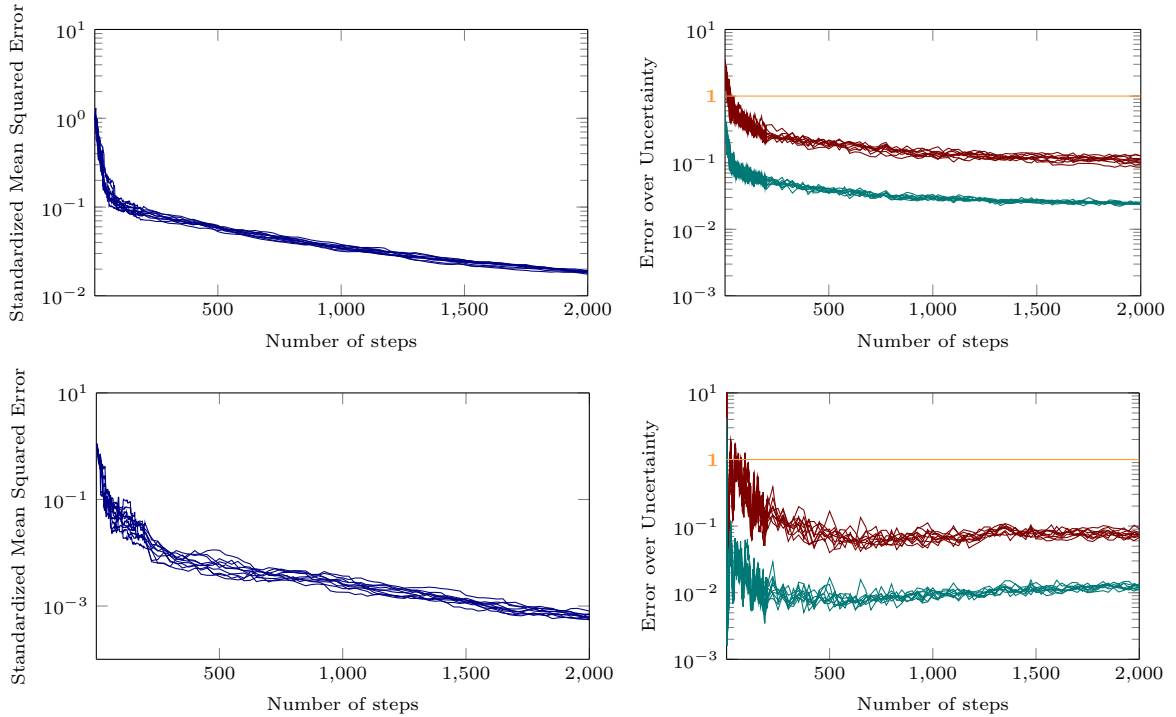

Figure 1: Ten Farthest Point Clustering initializations of the probabilistic subset of data approximation on the PUMADYN (**top row**) and CPU (**bottom row**) data sets, using the ARD Squared Exponential kernel. **Left:** standardized mean squared error for Subset of Data. **Right:** ratio between absolute error and uncertainty. The upper lines are the maximum, the lower lines the average over all test inputs. The horizontal line shows the theoretical bound at 1 that would be guaranteed if  $\mathbf{W} = \sqrt{2}\mathbf{H}$  where estimated exactly.

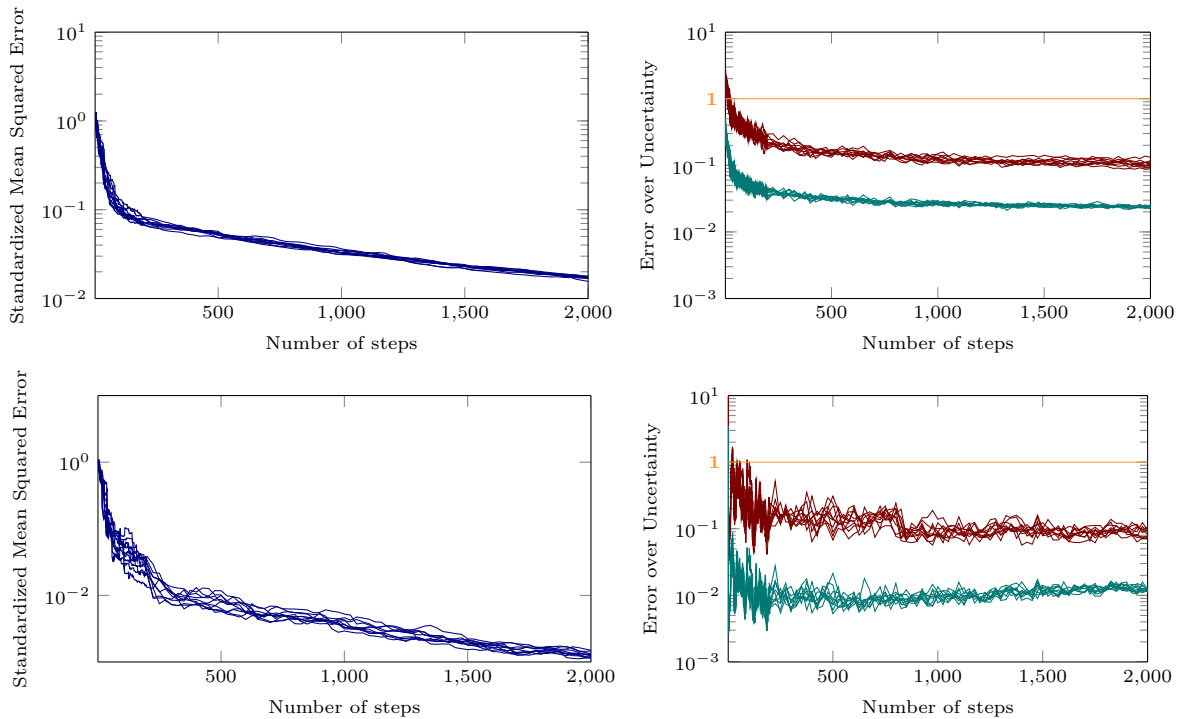

Figure 2: Same setup as Figure 1, but using the ARD Matérn  $5/2$  kernel.
